# Quantifying Beetle-Mediated Effects on Gas Fluxes from Dung Pats

Atte Penttilä<sup>1</sup>, Eleanor M. Slade<sup>1,2</sup>, Asko Simojoki<sup>3</sup>, Terhi Riutta<sup>4</sup>, Kari Minkkinen<sup>5</sup>, Tomas Roslin<sup>1\*</sup>

**1** Department of Agricultural Sciences, University of Helsinki, Helsinki, Finland, **2** Department of Zoology, University of Oxford, Oxford, United Kingdom, **3** Department of Food and Environmental Sciences, University of Helsinki, Helsinki, Finland, **4** Environmental Change Institute, University of Oxford, Oxford, United Kingdom, **5** Department of Forest Sciences, University of Helsinki, Helsinki, Finland

## Abstract

Agriculture is one of the largest contributors of the anthropogenic greenhouse gases (GHGs) responsible for global warming. Measurements of gas fluxes from dung pats suggest that dung is a source of GHGs, but whether these emissions are modified by arthropods has not been studied. A closed chamber system was used to measure the fluxes of carbon dioxide (CO<sub>2</sub>), methane (CH<sub>4</sub>) and nitrous oxide (N<sub>2</sub>O) from dung pats with and without dung beetles on a grass sward. The presence of dung beetles significantly affected the fluxes of GHGs from dung pats. Most importantly, fresh dung pats emitted higher amounts of CO<sub>2</sub> and lower amounts of CH<sub>4</sub> per day in the presence than absence of beetles. Emissions of N<sub>2</sub>O showed a distinct peak three weeks after the start of the experiment – a pattern detected only in the presence of beetles. When summed over the main grazing season (June–July), total emissions of CH<sub>4</sub> proved significantly lower, and total emissions of N<sub>2</sub>O significantly higher in the presence than absence of beetles. While clearly conditional on the experimental conditions, the patterns observed here reveal a potential impact of dung beetles on gas fluxes realized at a small spatial scale, and thereby suggest that arthropods may have an overall effect on gas fluxes from agriculture. Dissecting the exact mechanisms behind these effects, mapping out the range of conditions under which they occur, and quantifying effect sizes under variable environmental conditions emerge as key priorities for further research.

**Citation:** Penttilä A, Slade EM, Simojoki A, Riutta T, Minkkinen K, et al. (2013) Quantifying Beetle-Mediated Effects on Gas Fluxes from Dung Pats. PLoS ONE 8(8): e71454. doi:10.1371/journal.pone.0071454

**Editor:** Dorian Q. Fuller, University College London, United Kingdom

**Received:** December 28, 2012; **Accepted:** July 2, 2013; **Published:** August 7, 2013

**Copyright:** © 2013 Penttilä et al. This is an open-access article distributed under the terms of the Creative Commons Attribution License, which permits unrestricted use, distribution, and reproduction in any medium, provided the original author and source are credited.

**Funding:** This study was supported by grants from the Academy of Finland (<http://www.aka.fi/en-GB/A/>; grant number 138346 to T. Roslin) and Societas Biologica Fennica Vanamo (<http://www.vanamo.fi/>; a thesis grant to A. Penttilä). The funders had no role in study design, data collection and analysis, decision to publish, or preparation of the manuscript.

**Competing Interests:** The authors have declared that no competing interests exist.

\* E-mail: tomas.roslin@helsinki.fi

## Introduction

Climate change is now one of the greatest drivers of environmental modification worldwide [1], with agriculture and food production being major sources of the greenhouse gases (GHGs) responsible for global warming [2], [3]. Of all anthropogenic GHG emissions, 18% are produced by cattle farming – of anthropogenic nitrous oxide (N<sub>2</sub>O) and methane (CH<sub>4</sub>) emissions, the corresponding figures are 65% and 35–50%, respectively [2]. With global increases in meat consumption, the reduction of GHG emissions from livestock production has become of great importance [3]. Dung pats left on fields are a known source of both CH<sub>4</sub> and carbon dioxide (CO<sub>2</sub>) [4], [5]. Hence, processes contributing to the decomposition of dung, and to associated gas fluxes, are of key interest in assessing gas fluxes from cattle farming.

The decomposition of dung is primarily a biotic process involving a range of organisms [6–8]. Yet, most studies on GHG fluxes from dung consider the impacts of abiotic conditions, such as temperature and moisture (e.g. [9], [10]), or of plant and soil interactions [11], [12], whereas the role of the dung fauna has received considerably less attention. While recent findings suggest that the activity of earthworms may increase emissions of N<sub>2</sub>O and CO<sub>2</sub> from dung pats [13], [14], and increase the rate of CH<sub>4</sub>

production in soils [15], [16], the potential for other invertebrates to modify emissions of GHGs is little explored (but see [17–19]).

In temperate agricultural grasslands, dung beetles (Coleoptera: Scarabaeoidea) are the most important invertebrate contributors to dung decomposition [7]. Although the overall ecosystem services provided by dung beetles have gained much interest (see [20] for a review), their impact on GHG emissions has received insufficient attention. There is some evidence that they may influence nitrogen fluxes; beetles tunneling below dung pats have been found to reduce the volatilization of ammonia (NH<sub>3</sub>), thus improving the availability of inorganic nitrogen in the soil [5], [17], [21]. However, the effect of invertebrates on CH<sub>4</sub> fluxes from dung has not been studied. As CH<sub>4</sub> is formed in anaerobic conditions [22], and as dung beetles aerate the dung [23], we suggest that they may play an important role in reducing emissions of CH<sub>4</sub> from dung. Furthermore, some scarab beetles have also been shown to harbor intestinal methanogens, suggesting another possible mode for dung beetles to influence CH<sub>4</sub> fluxes [24], [25].

In this study, we empirically quantify the impact of dung beetles on the fluxes of three major GHGs: nitrous oxide (N<sub>2</sub>O), carbon dioxide (CO<sub>2</sub>), and methane (CH<sub>4</sub>) from dung pats. *A priori*, we hypothesized that the aerating influence of dung beetles would increase fluxes of N<sub>2</sub>O and CO<sub>2</sub> but decrease fluxes of CH<sub>4</sub>. To offer a first assessment of whether dung beetles may contribute to mitigating or accelerating climate change, we then quantified the

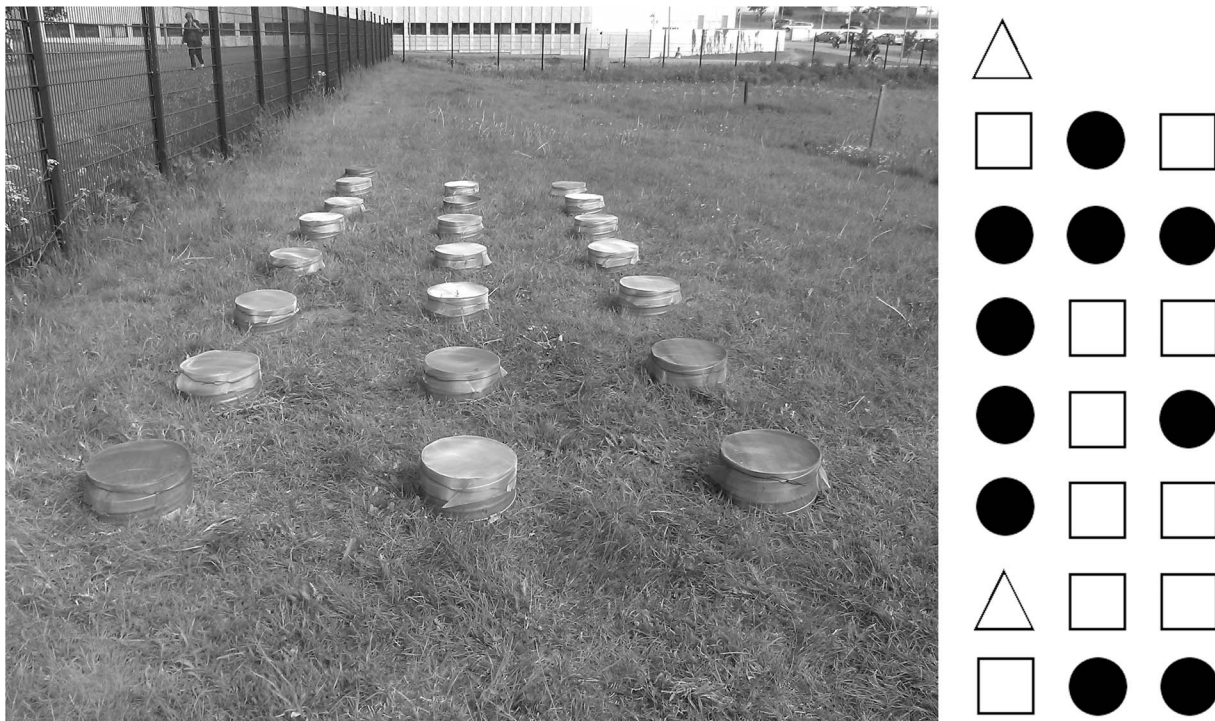

**Figure 1. Experimental design used in measuring gas fluxes.** (A) Twenty-two mesocosms were placed in an agricultural field, separated by distances of 70 cm. (B) These mesocosms were randomly assigned to three different treatments: 1) dung with dung beetles (open squares;  $n = 10$ ); 2) dung without dung beetles (filled circles;  $n = 10$ ), and 3) chambers containing neither dung nor beetles (open triangles;  $n = 2$ ). doi:10.1371/journal.pone.0071454.g001

cumulative effect of dung beetles on net releases of GHGs from dung pats exposed under semi-natural conditions over the main growing season (June–July) of the boreal zone. Overall, we describe a clear-cut signature of dung beetles on local GHG fluxes under the present experimental conditions, thus offering a seminal suggestion that dung beetles may exert a wider impact on GHG fluxes from agriculture.

## Materials and Methods

### Experimental Design

To examine the effect of dung beetles on gas fluxes from dung pats, we constructed three treatments: 1) dung pats with dung beetles ( $n = 10$ ), 2) dung pats without dung beetles ( $n = 10$ ), and 3) controls with neither dung pats nor dung beetles ( $n = 2$ ). As the latter treatment will capture gas fluxes from the soil of the pasture, it can be used as a point of comparison when evaluating gas fluxes from dung *per se*.

All treatments were implemented on a grass sward reflecting a multiannual Finnish pasture. The experimental area (located in Viikki, Helsinki, Southern Finland;  $60^{\circ} 13' 31''$  N  $25^{\circ} 1' 0''$  E; Fig. 1) is owned by the University of Helsinki, and hence no specific permission was required for this locality. Within the experimental field, the spatial distribution of replicates within each treatment was randomized among a set of 22 mesocosms (Fig. 1). Each mesocosm was constructed from a 25 cm section of 0.5 mm-thick air duct pipe of zinc-coated steel (31.5 cm). Each pipe section was then installed 10 cm into the ground, leaving a 15 cm-high collar above ground (Fig. 1).

Dung beetles were collected in pastures of the Koskis Manor in Salo, Southwestern Finland ( $60^{\circ} 22' 49''$  N  $23^{\circ} 17' 39''$  E) on May 31<sup>st</sup> and June 1<sup>st</sup> 2011. Explicit permission for sampling was

obtained from the owners of the Manor, Fredrik and Helena Von Limburg Stirum. The dung beetles collected were all in the genus *Aphodius* – the dominant group of dung beetles inhabiting Northern European pastures [26]. These species are small and typically live within the dung or at the soil-dung interface (endocoprids), although one species (*A. erraticus*) tunnels below the dung pat (paracoprid). The beetles were kept in moist paper at  $+4^{\circ}\text{C}$  until being used in the experiment. No protected species were sampled.

Dung for the experiment was gathered from the barn at the Viikki Study and Research Farm, owned by the University of Helsinki. Explicit permission was obtained from the Director of the farm, Miika Kahelin. The dung was collected from a herd of some twenty heads of Ayrshire cattle, all adult dairy cows. At the time of dung collection, the cattle had been grazing daily for approximately a month on improved pastures sown with a mix of timothy (*Phleum pratense*) and meadow fescue (*Festuca pratensis*) with a smaller component of red clover (*Trifolium pratense*). Outdoor grazing time ranged from 4 to 5 hours per day between 8 AM and 2 PM, with the dung collected as the cattle entered the barn for within-stall milking. When indoors, the cattle was fed additional silage *ad lib*, a standard concentrate (Maituri 20 and Amino-maituri 30, Raisio Oyj, Raisio, Finland) and magnesium-selenium-minerals (Pihatto-Melli; Raisio Oyj, Raisio, Finland). No animal in the herd had been given antibiotics or antiparasitic treatments. All dung was manually homogenized before partitioning into experimental pats.

On June 7<sup>th</sup>, the dung was split into pats of 1.2 litres each, and distributed into the mesocosms. The pat size used was based on two criteria: first, while natural cow pats will vary in size, we used a size within the typical size range [27], second, we chose a size that left a *ca.* 5 cm rim of vegetation outside of the pat within the

**Table 1.** Dung beetle abundances used in the experiment.

| Species                                          | Individual dry mass (mg) | Per chamber* | Total <sup>†</sup> |
|--------------------------------------------------|--------------------------|--------------|--------------------|
| <i>Aphodius ater</i> (De Geer, 1774)             | 4.2                      | 73           | 730                |
| <i>Aphodius fimetarius</i> (Linnaeus, 1758)      | 9.4                      | 5            | 50                 |
| <i>Aphodius depressus</i> (Kugelann, 1792)       | 9.1                      | 4            | 40                 |
| <i>Aphodius erraticus</i> (Linnaeus, 1758)       | 13.6                     | 41           | 410                |
| <i>Aphodius haemorrhoidalis</i> (Linnaeus, 1758) | 2.2                      | 11           | 110                |
| <i>Aphodius pusillus</i> (Herbst, 1789)          | 1.0                      | 7            | 70                 |
| <i>Aphodius fossor</i> (Linnaeus, 1758)          | 26.1                     | 12           | 120                |
| Total                                            |                          | 153          | 1530               |

Information on species-specific dry masses taken from [39].

\*Species-specific number of individuals added to each replicate chamber in treatment 1.

<sup>†</sup>Species-specific total counts used in the experiment.

doi:10.1371/journal.pone.0071454.t001

mesocosm, mimicking the situation on a natural pasture. Seven species of beetles were then distributed among the mesocosms in numbers reflecting their natural distribution in the field (Table 1).

### Chamber Measurements

To evaluate gas fluxes from the dung pats, we used a closed chamber method [28]. The chambers were constructed following the USDA-ARS GRACEnet Chamber-based Trace Gas Flux

Measurement protocol 2003 [29], [30]. The sections of air duct pipe used as mesocosms (see above) also formed the chamber collars. Between measurements, these collars were closed by a metal mesh, allowing air circulation while keeping the dung beetles from escaping. The vegetation inside the chambers was kept low by manual trimming. For additional details on chamber design see Appendix S1.

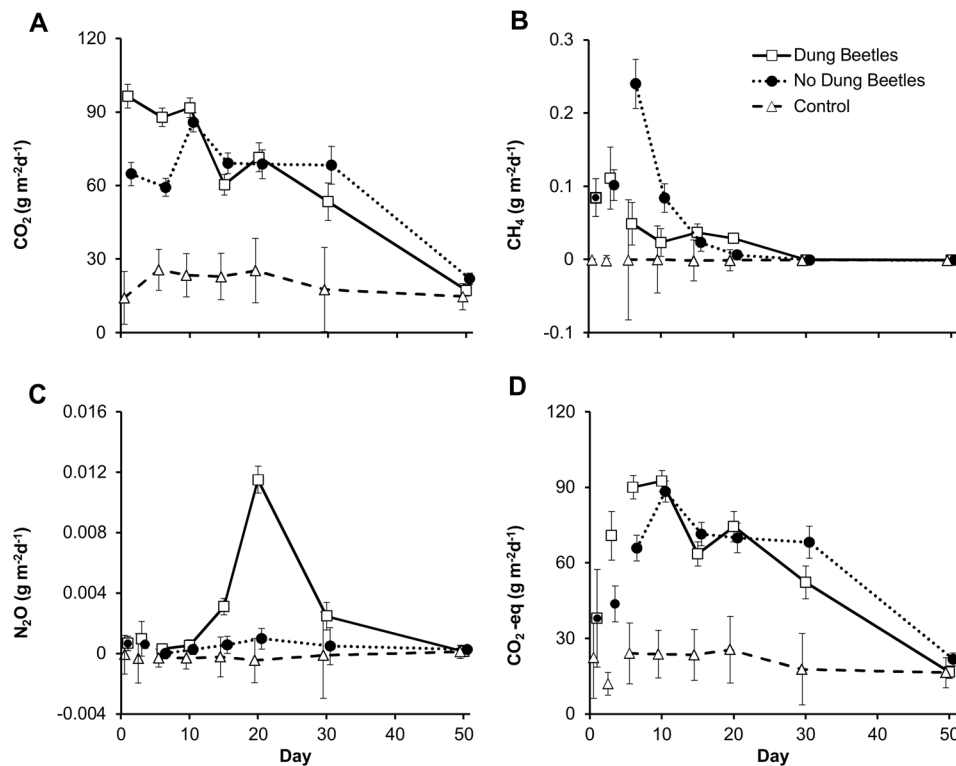

**Figure 2. Fluxes of (a) CO<sub>2</sub> (b) CH<sub>4</sub> (c) N<sub>2</sub>O and (d) carbon dioxide equivalents.** Light gray symbols refer to empirical observations, with treatments identified by the same symbol styles as used in Fig. 1. Symbols with 95% confidence limits show least squares means estimated by a GLMM model (for details, see text and Table 2). To reveal overlapping data points, empirical values were slightly offset in the horizontal dimension. As measurements of CH<sub>4</sub> (panel b) and N<sub>2</sub>O (panel c) were lost for the first measuring date of 2011, these values are replaced by estimates from a separate experiment conducted in 2012 (see Appendix A for details). For clarity, estimates of 2011 are connected by lines, whereas estimates from 2012 are shown as separate data points (referring to arithmetic means with confidence limits derived from a *t*-distribution). Note the different scales of the y-axes, and that treatments are identified by the same symbols as in Figure 1.

doi:10.1371/journal.pone.0071454.g002

**Table 2.** Generalized linear mixed-effect models of changes in fluxes over time.

| Effect                            | F Value <sup>a</sup> | Num DF | Den DF | P value |
|-----------------------------------|----------------------|--------|--------|---------|
| <b>CO<sub>2</sub></b>             |                      |        |        |         |
| Treatment <sup>b</sup>            | 95.03                | 2      | 23.5   | <.0001  |
| Measurement <sup>c</sup>          | 138.44               | 6      | 31.4   | <.0001  |
| Measurement × Treatment           | 40.72                | 12     | 42.2   | <.0001  |
| <b>CH<sub>4</sub></b>             |                      |        |        |         |
| Treatment                         | 28.60                | 2      | 21.3   | <.0001  |
| Measurement <sup>d</sup>          | 11.29                | 5      | 33.7   | <.0001  |
| Measurement × Treatment           | 12.91                | 10     | 41.1   | <.0001  |
| <b>N<sub>2</sub>O</b>             |                      |        |        |         |
| Treatment                         | 75.05                | 2      | 33.3   | <.0001  |
| Measurement <sup>d</sup>          | 38.49                | 5      | 29.9   | <.0001  |
| Measurement × Treatment           | 42.09                | 10     | 33.2   | <.0001  |
| <b>CO<sub>2</sub> equivalents</b> |                      |        |        |         |
| Treatment                         | 74.50                | 2      | 27.2   | <.0001  |
| Measurement <sup>d</sup>          | 183.44               | 5      | 37.8   | <.0001  |
| Measurement × Treatment           | 32.43                | 10     | 44.5   | <.0001  |

<sup>a</sup>Type 3 F-tests of fixed effects are given.  
<sup>b</sup>Mesocosms with 1) dung pats and dung beetles, 2) dung pats and no dung beetles, or 3) neither dung pats nor dung beetles.  
<sup>c</sup>Measurement day 1, 6, 10, 15, 20, 30 and 50.  
<sup>d</sup>Measurement day 6, 10, 15, 20, 30 and 50.  
 doi:10.1371/journal.pone.0071454.t002

**Gas Flux Measurements**

Gas fluxes were measured between 09:00–17:00 hours on seven occasions between June 8<sup>th</sup> and July 27<sup>th</sup> 2011, corresponding to days 1, 6, 10, 15, 20, 30 and 50 of the experiment (described in Appendix S1). For measurements of CH<sub>4</sub> and N<sub>2</sub>O gas samples were taken with a syringe after 5, 10, 20, and 30 minutes of the chamber being sealed, and injected into glass vials (3-ml Labco Exetainers® with double septa, Labco Ltd., Buckinghamshire, UK). CH<sub>4</sub> and N<sub>2</sub>O were then quantified in parts per million (ppm by volume) by gas chromatographs (HP 5890 Series II, Hewlett Packard, Palo Alto, CA, U.S.A.) equipped with thermal conductivity, flame ionization and electron capture detectors.

Measurements of CO<sub>2</sub> fluxes were carried out in the field with a portable device (a modified version of the SRC-1 soil respiration chamber and the EGM-4 infrared CO<sub>2</sub> analyzer, PP Systems, Amesbury, MA, U.S.A.; for similar designs see [28], [31]). CO<sub>2</sub> fluxes were measured approximately four hours after the CH<sub>4</sub> and N<sub>2</sub>O samples were taken (between 13:00 and 17:00 hours). The sampling time for each chamber was set to 80 seconds and the measuring interval was 4.8 seconds. Ambient temperature was recorded during the sampling of all gases, for later scaling of gas fluxes to temperatures. For additional details on gas flux measurements see Appendix S1 and for a description of environmental conditions during the experiment see Appendix S2.

Different greenhouse gases have different Global Warming Potentials (GWP) [1]. To derive a joint measure of the warming effect of the gas fluxes quantified above, we therefore used compound-specific multipliers suggested by the IPCC [1] (25 for CH<sub>4</sub> and 298 for N<sub>2</sub>O) to weigh together the contribution of individual compounds into the general currency of “CO<sub>2</sub> equivalents”, at a 100-year time horizon.

A technical problem with the rubber septa used in the sampling vials resulted in the complete loss of data on all CH<sub>4</sub> and N<sub>2</sub>O fluxes for the first sampling date (June 8, 2011). During the following measurement round (June 14; day 6 of the experiment), heavy rains half-way into the measurements resulted in the loss of

**Table 3.** Average cumulative fluxes and CO<sub>2</sub> equivalents (g m<sup>-2</sup>, ±SD) of greenhouse gases in the different experimental treatments.

| Treatment                                         | Cumulative fluxes <sup>a</sup>    |                                    |                                                    | CO <sub>2</sub> equivalents <sup>b</sup> |                                                    |                                    |                                   |
|---------------------------------------------------|-----------------------------------|------------------------------------|----------------------------------------------------|------------------------------------------|----------------------------------------------------|------------------------------------|-----------------------------------|
|                                                   | CO <sub>2</sub>                   | CH <sub>4</sub>                    | N <sub>2</sub> O                                   | CH <sub>4</sub>                          | N <sub>2</sub> O                                   | CH <sub>4</sub> + N <sub>2</sub> O | Total                             |
| Control (F <sub>C</sub> )                         | 986 ± 114                         | -0.043 ± 0.006                     | -0.005 ± 0.001                                     | -1.078 ± 0.149                           | -1.516 ± 0.396                                     | -2.594 ± 0.545                     | 983 ± 114                         |
| Dung beetles (F <sub>B</sub> )                    | 2924 ± 297                        | 1.071 ± 0.246                      | 0.136 ± 0.037                                      | 26.789 ± 6.152                           | 40.380 ± 11.087                                    | 67.169 ± 11.528                    | 2991 ± 297                        |
| No dung beetles (F <sub>N</sub> )                 | 2956 ± 236                        | 1.770 ± 0.376                      | 0.028 ± 0.020                                      | 44.237 ± 9.402                           | 8.488 ± 5.680                                      | 52.725 ± 11.527                    | 3009 ± 231                        |
| F <sub>B</sub> versus F <sub>N</sub> <sup>c</sup> | t <sub>18</sub> = -0.27, P = 0.79 | t <sub>18</sub> = -4.91, P = 0.001 | t <sub>13,4</sub> = 8.10 <sup>d</sup> , P < 0.0001 | t <sub>18</sub> = -4.91, P = 0.001       | t <sub>13,4</sub> = 8.10 <sup>d</sup> , P < 0.0001 | t <sub>18</sub> = 2.80, P = 0.01   | t <sub>18</sub> = -0.15, P = 0.88 |
| (F <sub>B</sub> -F <sub>N</sub> )/F <sub>N</sub>  | -1%                               | -39%                               | 386%                                               | -39%                                     | 386%                                               | 27%                                | -0.6%                             |

<sup>a</sup>Cumulative fluxes were calculated separately for each chamber as areas under the temporal gas flux curve (Fig. 2; see also Appendix A). For CH<sub>4</sub>, N<sub>2</sub>O and CO<sub>2</sub> equivalents, measurements from day 1 and 3 were based on a separate experiment conducted in 2012 (see Appendix A), whereas all CO<sub>2</sub> measurements were based on data collected in 2011.  
<sup>b</sup>Compound-specific multipliers suggested by the IPCC (2007) were used to weigh together the contribution of individual compounds into the general currency of “CO<sub>2</sub> equivalents”, at a 100-year time horizon. Thus, fluxes of CH<sub>4</sub> were converted to CO<sub>2</sub> equivalents through multiplication by a factor of 25, and fluxes of N<sub>2</sub>O through multiplication by a factor of 298. As the net warming impact of carbon first tied by plants, then released from the dung as CO<sub>2</sub> will differ from that of CH<sub>4</sub> or N<sub>2</sub>O fluxes from dung (see Discussion), we derive separate subtotals for the cumulative emission of CO<sub>2</sub> equivalents of CH<sub>4</sub>, N<sub>2</sub>O, and their sum, as well as summing their total (equaling the warming impact of CO<sub>2</sub>, CH<sub>4</sub>, and N<sub>2</sub>O combined).  
<sup>c</sup>Row F<sub>B</sub> versus F<sub>N</sub> shows the results of a compound-specific t-test of treatments F<sub>B</sub> (presence of dung beetles) versus F<sub>N</sub> (absence of dung beetles). The last row of the table shows the ratio between fluxes in the presence (F<sub>B</sub>) versus absence (F<sub>N</sub>) of dung beetles as the percentage ((F<sub>B</sub>-F<sub>N</sub>)/F<sub>N</sub>). Variation in degrees of freedom reflects differences between tests based on equal versus unequal variances. (Where not otherwise specified, the test was based on the assumption of equal variances, as supported by a non-significant Levene’s test).  
<sup>d</sup>Test based on unequal variances (cf. Fig. 2c); test of equality of variances, F<sub>9,9</sub> = 3.81 P = 0.03.  
 doi:10.1371/journal.pone.0071454.t003

CH<sub>4</sub> and N<sub>2</sub>O readings for two out of ten chambers with beetles and four out of ten chambers without beetles.

To replace the lost measurements of CH<sub>4</sub> and N<sub>2</sub>O fluxes for the first sampling date of 2011, a supplementary experiment was conducted in June 2012. In brief, dung fluxes were measured over three days from fresh dung with and without beetles. A detailed description of and justification for using data from this experiment is given in Appendix S1. In further analyses of cumulative gas emissions from dung pats (see Discussion), estimates of early CH<sub>4</sub> and N<sub>2</sub>O fluxes of 2011 were hence replaced by estimates from 2012. Estimates of date-specific flux rates (see below, Statistical analyses and Results) were still focused on data for 2011 alone, thus conservatively preventing any influence of experiment-to-experiment variation.

### Statistical Analyses

To analyse how the fluxes of different compounds varied with time and treatment, we used generalized linear mixed-effects models (GLMMs). A separate, compound-specific model was built for each response (i.e. for fluxes of CO<sub>2</sub>, CH<sub>4</sub>, N<sub>2</sub>O and CO<sub>2</sub> equivalents, respectively). The models were fitted in SAS v. 9.2, procedure mixed (SAS Institute Inc., Cary, NC), using a repeated-measures structure with chamber as the subject. To account for the non-independence of consecutive measurements, we assumed a first-order antedependence structure. To allow the strength of dependence to vary with the specific pair of measurements being referenced we specified TYPE = ANTE(1) [32].

To evaluate the statistical significance of the patterns observed, we used the fitted model to derive 95% confidence limits for each mean. Flux estimates with confidence intervals excluding zero were then interpreted as statistically significant sources (CL>0) or sinks (CL<0).

## Results

### Temporal Patterns in Gas Fluxes

A clear imprint of dung beetles was evident on all gas fluxes examined.

**Fluxes of CO<sub>2</sub>.** Emissions of CO<sub>2</sub> differed significantly among treatments (Table 2). Overall, fluxes from the control treatment (containing neither dung nor beetles) were significantly lower than fluxes from treatments with dung (Fig. 2a). In the two treatments with dung, emissions peaked markedly earlier when dung beetles were present than when they were absent (on the first versus 10<sup>th</sup> day of the experiment; Fig. 2a).

**Fluxes of CH<sub>4</sub>.** Fluxes of methane differed significantly among treatments (Table 2). In particular, the treatment without dung beetles emitted five times higher amounts of CH<sub>4</sub> on day 6 of the experiment than did the other treatments (Figure 2b). For the control treatment, fluxes remained minor throughout the experiment. Towards the end of the experiment, the CH<sub>4</sub> emissions leveled out across treatments. At this stage, all fluxes were close to zero (Fig. 2b).

**Fluxes of N<sub>2</sub>O.** Fluxes of nitrous oxide were relatively low over time (Fig. 2c), but differed among treatments (Table 2). The most pronounced difference among treatments occurred as a distinct spike in N<sub>2</sub>O emissions from the dung pats with dung beetles at day 20 (Fig. 2c). Again, fluxes from the control remained negligible over the full course of the experiment (Fig. 2c).

**Fluxes of CO<sub>2</sub> equivalents.** Fluxes of carbon dioxide equivalents differed significantly among treatments (Table 2), with the main differences occurring between the control and the two treatments with dung (Fig. 2d). Nonetheless, dung treatments with and without beetles differed significantly from each other on days

6 and 30 of the experiment (Fig. 2d), albeit in different directions. As the absolute fluxes of CO<sub>2</sub> were much higher than fluxes of CH<sub>4</sub> and N<sub>2</sub>O (see the scale of ordinate Figs 2a–2c), overall fluxes of CO<sub>2</sub> equivalents were dominated by the CO<sub>2</sub> component (compare Fig. 2a vs. 2d).

## Discussion

This study is, to our knowledge, the first to explore the effects of arthropods on GHG fluxes from dung pats. Overall, flux rates from dung were found to be substantial, with fresh dung pats emitting higher amounts of CO<sub>2</sub> and lower amounts of CH<sub>4</sub> in the presence of dung beetles. Three weeks after the start of the experiment, emissions of N<sub>2</sub>O showed a distinct peak in the presence of beetles – a pattern not detected in the treatments without dung beetles. Overall, these findings reveal a potential impact of dung beetles on gas fluxes realized at a small spatial scale. While here observed for a specific set of conditions in a specific experimental setting, the current results suggest that arthropods may have a general impact on gas fluxes from agriculture – a prediction which may now be tested by further work.

### Dung Pats Release Large Amounts of Greenhouse Gases

Our study identified dung as a major source of GHGs. Absolute flux rates of CO<sub>2</sub>, CH<sub>4</sub> and N<sub>2</sub>O in chambers with dung were observed to be high compared to emissions from agricultural soils in general [4], [11], [12], [33] – and compared to the fluxes observed in our control chambers without dung. However, the elevated fluxes from individual pats were of relatively short duration (Fig. 2; see also [4]).

The present results support earlier studies identifying dung as an important source of GHG emissions from agriculture. These studies also found significant fluxes of CO<sub>2</sub>, CH<sub>4</sub> and N<sub>2</sub>O from dung (e.g. [5], [9], [10], [12], [33]). CH<sub>4</sub> emissions from the dung of grazing dairy cows have been observed to be particularly high, ranging from 300 to 2040 mg CH<sub>4</sub> m<sup>-2</sup> over the first ten days [4]. Even if dung only covers a fraction of the pasture surface, the overall CH<sub>4</sub> budget of a boreal pasture switches from a CH<sub>4</sub> sink into a CH<sub>4</sub> source when emissions from dung pats are taken into account [12]. These considerations highlight the importance of including dung pats, and the factors influencing gas fluxes from them, in studies of agricultural GHG emissions.

### Dung Beetles Modify GHG Fluxes from Fresh Dung

The largest impacts of dung beetles on gas fluxes from dung were found for CH<sub>4</sub>. Initial emissions from six-day old dung pats without beetles were five times higher than emissions from pats with beetles (Fig. 2b). As CH<sub>4</sub> is formed under anaerobic conditions, the difference between the two treatments can likely be traced to the aerating effect of dung beetle tunnels [23]. By digging holes, beetles may enhance the drying of dung pats and increase the availability of oxygen in the deeper parts of the pats, thus increasing aerobic decomposition, decreasing anaerobic decomposition and reducing methanogenesis. Thus, by oxygenating the dung pat interior, dung beetles may be exerting an effect different from that of earthworms – which are suggested to promote anaerobic decomposition [13], [15].

Dung beetles also significantly modified fluxes of CO<sub>2</sub>, with higher CO<sub>2</sub> fluxes from pats with beetles during the first week of the experiment. The exact contribution of respiration by the beetles themselves is so far unknown, and should be quantified in further experiments. However, after the 20<sup>th</sup> day of the experiment, CO<sub>2</sub> emissions from dung pats lacking dung beetles

surpassed those from pats with dung beetles. A similar transient, short-term effect of earthworms on CO<sub>2</sub> emissions from soil has also been observed [16].

The most unexpected effect of dung beetle presence was a spike in emissions of N<sub>2</sub>O around day 20. Sporadic peaks in N<sub>2</sub>O fluxes have been found before [34], but such patterns are hard to explain, as the formation of N<sub>2</sub>O by microbes is based on complex processes [35]. However, dung beetles have been suggested to increase NO<sub>3</sub><sup>-</sup> levels by aerating the substrate, a process leading to more N<sub>2</sub>O being released from denitrification [21]. Similarly, earthworms have been found to increase denitrification [13], possibly by providing optimal conditions for denitrifying bacteria to function in their gut [16], [36]. As a methodological concern, the episodic nature of these pulses also implies that some of them may go undetected.

While our results confirm that dung beetles can significantly modify the temporal patterns of GHG emissions from dung pats, they do not enable us to uncover the exact mechanisms behind them: the current patterns were conditional on the specific circumstances of our experiment (for a description of general environmental conditions, see Appendix S2). Nonetheless, differences in trajectories for individual GHG compounds point to interesting physiochemical processes occurring within the ageing pat, and call for further exploration of causal factors.

## Implications

The fluxes observed in this study allow us to estimate overall GHG emissions over the full course of the experiment by integrating the area under the curves in Fig. 2 (for exact derivations of the following estimates see Appendix S1). Overall, the effects of dung beetles were different on different GHGs. For CO<sub>2</sub>, a change in emission levels between the early and late parts of the experiment (Fig. 2a) caused emission levels to almost converge between treatments (Table 3). Cumulative emissions of N<sub>2</sub>O showed an almost four-fold increase in the presence of beetles (Table 3), whereas for CH<sub>4</sub>, the effects were the opposite: over the course of the experiment, the pooled emissions of CH<sub>4</sub> from pats with beetles were more than a third lower than those from pats without beetles (Table 3).

To evaluate the overall warming effect of GHG emissions from dung pats, compound-specific emissions should be gauged against each other. A crucial question is then what currency to use in evaluating the overall effect of dung beetles. In our experiment, emissions of both CH<sub>4</sub> and N<sub>2</sub>O were dwarfed by fluxes of CO<sub>2</sub> (Fig. 2). Thus, overall fluxes proved similar across treatments when converted to total CO<sub>2</sub> equivalents (Table 3), suggesting that the effect of beetles may be negligible. Nonetheless, the beetles had a strong effect on the profile of compounds released (Fig. 1, Table 3). Most crucially, fluxes of CO<sub>2</sub> may actually offer a secondary concern – as should all carbon taken up as CO<sub>2</sub> by plants later be released in the same form (i.e. as CO<sub>2</sub>) from dung, then cattle farming might actually be considered to be carbon neutral.

## References

1. IPCC (2007) Climate Change 2007: Synthesis Report. Contribution of Working Groups I, II and III to the Fourth Assessment Report of the Intergovernmental Panel on Climate Change Geneva, Switzerland. 104 p.
2. FAO (2006) Livestock's long shadow, environmental issues and options. Rome, Italy: Food and Agriculture Organization of the United Nations.
3. Bellarby J, Tirado R, Leip A, Weiss F, Lesschen JP, et al. (2013) Livestock greenhouse gas emissions and mitigation potential in Europe. *Global Change Biology* 19: 3–18.
4. Jarvis SC, Lovell RD, Panayides R (1995) Patterns of methane emission from excreta of grazing animals. *Soil Biology & Biochemistry* 27: 1581–1588.
5. Ma XZ, Wang SP, Wang YF, Jiang GM, Nyren P (2006) Short-term effects of sheep excrement on carbon dioxide, nitrous oxide and methane fluxes in typical

grassland of Inner Mongolia. *New Zealand Journal of Agricultural Research* 49: 285–297.

Therefore, the main anthropogenic effect is the conversion of some of this carbon to the much more potent GHG of CH<sub>4</sub>, and the concurrent emission of N<sub>2</sub>O. In our experiment, the effect of beetles on overall CH<sub>4</sub> emissions was strong, with an effect size of more than one-third (−39%; Table 3). Conversely, if CH<sub>4</sub> and N<sub>2</sub>O fluxes are considered together, then overall, the presence of beetles increased the warming effect of gas fluxes from dung pats by almost a third (+27%; Table 3). However, this increase is due to the specific spike in N<sub>2</sub>O emissions around day 20, and further experiments are needed to detect whether this a replicable effect of dung beetles *per se*. Calculating the overall warming potential of GHG fluxes from dung – and the effect of beetles thereon – is then no simple exercise, but one urgently needed.

In conclusion, our paper offers a first demonstration that dung beetles can have an impact on GHG fluxes from agriculture. As the patterns reported here could be conditional on specific experimental conditions, they point to some immediate needs for further research. Most urgently, we need to dissect the exact mechanisms behind the patterns observed, map out the range of conditions under which they occur, and quantify the effect sizes under variable environmental conditions. We also note that our study targeted the effects of a specific group of dung beetles (genus *Aphodius*), and that the effects of other beetles of lower abundance but potentially higher functional efficiency (i.e. genus *Geotrupes* [37], [38]) remain to be established. Only by addressing these challenges can we identify the net importance of arthropod-mediated effects on GHG fluxes from dung. While resolving these questions will call for substantial work, we hope that our paper will act as a catalyst for further activity in this field.

## Supporting Information

**Appendix S1** Supplementary methods used in measuring gas fluxes. (DOC)

**Appendix S2** Environmental conditions during the experiment. (DOC)

## Acknowledgments

We thank Bess Hardwick for help with collecting dung beetles, and with creating the graphs. Miira Jääskeläinen offered support with the gas chromatograph, and Aleksi Kiemä and Olavi Väärämäki contributed to the construction of mesocosms. Comments from the Journal Club of the Spatial Foodweb Ecology Group, Dr Dorian Fuller and two anonymous reviewers substantially improved the manuscript.

## Author Contributions

Conceived and designed the experiments: AP T. Roslin T. Riutta AS KM ES. Performed the experiments: AP AS T. Roslin. Analyzed the data: T. Roslin AP AS. Contributed reagents/materials/analysis tools: AP AS. Wrote the paper: T. Roslin AP ES.

10. Lin XW, Wang SP, Ma XZ, Xu GP, Luo CY, et al. (2009) Fluxes of CO<sub>2</sub>, CH<sub>4</sub>, and N<sub>2</sub>O in an alpine meadow affected by yak excreta on the Qinghai-Tibetan plateau during summer grazing periods. *Soil Biology & Biochemistry* 41: 718–725.
11. Virkajärvi P, Maljanen M, Saarijärvi K, Haapala J, Martikainen P (2010) N<sub>2</sub>O emissions from boreal grass and grass - clover pasture soils. *Agriculture, ecosystems and environment* 137: 59–67.
12. Maljanen ME, Virkajärvi P, Martikainen PJ (2012) Dairy cow excreta patches change the boreal grass swards from sink to source of methane. *Agricultural and food Science* 21: 91–99.
13. Rizhiya E, Bertora C, van Vliet PCJ, Kuikman PJ, Faber JH, et al. (2007) Earthworm activity as a determinant for N<sub>2</sub>O emission from crop residue. *Soil Biology & Biochemistry* 39: 2058–2069.
14. Giannopoulos G, Pulleman MM, van Groenigen JW (2010) Interactions between residue placement and earthworm ecological strategy affect aggregate turnover and N<sub>2</sub>O dynamics in agricultural soil. *Soil Biology & Biochemistry* 42: 618–625.
15. Koubová A, Goberna M, Šimek M, Chroňáková A, Pižl V, et al. (2012) Effects of the earthworm *Eisenia andrei* on methanogens in a cattle-impacted soil: A microcosm study. *European Journal of Soil Biology* 48: 32–40.
16. Lubbers IM, van Groenigen KJ, Fonte SJ, Six J, Brussaard L, et al. (2013) Greenhouse-gas emissions from soils increased by earthworms. *Nature Clim Change* advance online publication.
17. Kazuhira Y, Hideaki K, Hirofumi T (1991) Paracoprid dung beetles and gaseous loss of nitrogen from cow dung. *Soil Biology and Biochemistry* 23: 643–647.
18. Šustr V, Šimek M (2009) Methane release from millipedes and other soil invertebrates in Central Europe. *Soil Biology & Biochemistry* 41: 1684–1688.
19. Collison EJ, Riutta T, Slade EM (2013) Macrofauna assemblage composition and soil moisture interact to affect soil ecosystem functions. *Acta Oecologica*: in press.
20. Nichols E, Spector S, Louzada J, Larsen T, Amequita S, et al. (2008) Ecological functions and ecosystem services provided by Scarabaeinae dung beetles. *Biological Conservation* 141: 1461–1474.
21. Yokoyama K, Kai H, Tsuchiyama H (1991) Paracoprid dung beetles and gaseous loss of nitrogen from cow dung. *Soil Biology & Biochemistry* 23: 643–647.
22. Le Mer J, Roger P (2001) Production, oxidation, emission and consumption of methane by soils: A review. *European Journal of Soil Biology* 37: 25–50.
23. Stevenson BG, Dindal DL (1987) INSECT EFFECTS ON DECOMPOSITION OF COW DUNG IN MICROCOSMS. *Pedobiologia* 30: 81–92.
24. Hackstein J, Stumm CK (1994) Methane production in terrestrial arthropods. *Proceedings of the National Academy of Sciences* 91: 5441–5445.
25. Hackstein JH, van Alen TA, Rosenberg J (2006) Methane production by terrestrial arthropods. *Intestinal Microorganisms of Termites and Other Invertebrates*: Springer. 155–180.
26. Hanski I (1991) North temperate dung beetles. In: Cambefort Y, editor. *Dung beetle ecology*. New Jersey: Princeton University Press. 75–96.
27. Finn JA, Giller PS (2000) Patch size and colonisation patterns: an experimental analysis using north temperate coprophagous dung beetles. *Ecography* 23: 315–327.
28. Alm J, Shurpali NJ, Tuittila E-S, Laurila T, Maljanen M, et al. (2007) Methods for determining emission factors for the use of peat and peatlands flux measurements and modelling. *Boreal Environment Research* 12: 85–100.
29. USDA-ARS (2003) Chamber-based trace gas flux measurement protocol. Washington DC, U.S.A: United States Department of Agriculture, Agricultural Research Service.
30. McGinn SM (2006) Measuring greenhouse gas emissions from point sources in agriculture. *Canadian Journal of Soil Science* 86: 355–371.
31. Pumpanen J, Kolari P, Ilvesniemi H, Minkkinen K, Vesala T, et al. (2004) Comparison of different chamber techniques for measuring soil CO<sub>2</sub> efflux. *Agricultural and Forest Meteorology* 123: 159–176.
32. Moser EB (2004) Repeated measures modeling with PROC MIXED. *Proceedings of the 29th SAS Users Group International Conference*.
33. Holter P (1997) Methane emissions from Danish cattle dung pats in the field. *Soil Biology & Biochemistry* 29: 31–37.
34. Kanerva T, Regina K, Ramo K, Karhu K, Ojanpera K, et al. (2005) Mesocosms mimic natural meadows as regards greenhouse gas fluxes and potential activities of nitrifying and denitrifying bacteria. *Plant and Soil* 276: 287–299.
35. Oenema O, Wrage N, Velthof GL, van Groenigen JW, Dolfing J, et al. (2005) Trends in global nitrous oxide emissions from animal production systems. *Nutrient Cycling in Agroecosystems* 72: 51–65.
36. Drake HL, Horn MA (2006) Earthworms as a transient heaven for terrestrial denitrifying microbes: A review. *Engineering in Life Sciences* 6: 261–265.
37. Rosenlew H, Roslin T (2008) Habitat fragmentation and the functional efficiency of temperate dung beetles. *Oikos* 117: 1659–1666.
38. Kaartinen R, Hardwick B, Roslin T (2013) Using citizen scientists to measure an ecosystem service nationwide. *Ecology*: 10.1890/1812-1165.1891.
39. Roslin T (2000) Dung beetle movements at two spatial scales. *Oikos* 91: 323–335.
